# Supplementary material for: APTC-C-SA01: A Novel Bacteriophage Cocktail Targeting Staphylococcus aureus and MRSA Biofilms
Source: MDPI journal article supplement (doi:10.3390/ijms23116116), 2022-05-30
Supplement: s1 [file s1]

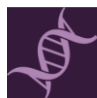

Supplementary Figure 1

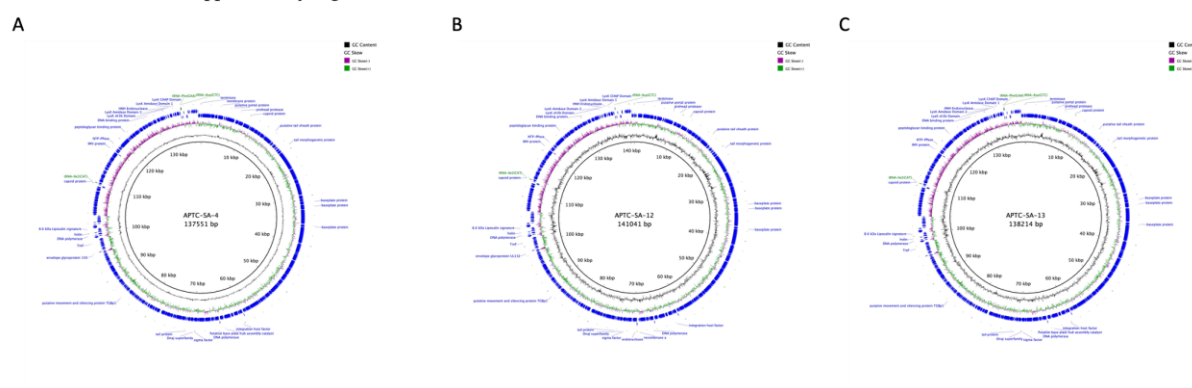

**Supplementary Figure 1:** Map of genomic organization of bacteriophage (A) APTC-SA-4; (B) APTC-SA-12 and (C) APTC-SA-13. The Open Reading Frames with predicted annotations are indicated with blue arrows and predicted tRNAs are indicated with green arrows.
